# Supplementary material for: Sensitive detection of dipeptidyl peptidase based on DNA–peptide conjugates and double signal amplification of CHA and DNAzymes
Source: Royal Society of Chemistry journal article supplement (doi:10.1039/d4tb01288g), 2024-01-01
Supplement: d4tb01288g1.pdf [file d4tb01288g1.pdf]

## Sensitive Detection of Dipeptidyl Peptidase Based on DNA-Peptide Conjugate and double signal amplification of CHA and DNazymes

Yan Chen<sup>a1</sup>, Miao He<sup>a1</sup>, Feifan Yin<sup>a</sup>, Wenting Cheng<sup>a</sup>, Zhongyun Wang<sup>c,\*</sup>, Yang Xiang<sup>a,b,\*</sup>

<sup>a</sup>State Key Laboratory of Pharmaceutical Biotechnology, School of Life Sciences, Nanjing University, Nanjing 210023, P. R. China

<sup>b</sup>State Key Laboratory of Natural and Biomimetic Drugs, Peking University, Beijing 100191, P. R. China

<sup>c</sup>Department of Anesthesiology, The First Affiliated Hospital of Nanjing Medical University, Nanjing 210029, P. R. China

\*Corresponding authors.

E-mail address:xiangy@nju.edu.cn (Y. Xiang), zywang1970@126.com (Z. Wang)

<sup>†</sup>These authors contributed equally to this work.

## Contents

|                                                                                 |    |
|---------------------------------------------------------------------------------|----|
| <b>Table S1.</b> The DNA sequences used in this work .....                      | 4  |
| <b>Fig. S1</b> Mass spectrum of the pep-CHA-H0 and DNA-peptide conjugates ..... | 5  |
| <b>Fig. S2</b> Supernatants before and after magnetic conjugation.....          | 6  |
| <b>Fig. S3</b> UV–vis absorbance responses of bare AuNPs .....                  | 7  |
| <b>Fig. S4</b> TEM of AuNPs and AuNPs-DNA .....                                 | 8  |
| <b>Fig. S5</b> Zeta potential of AuNPs and AuNPs-DNA .....                      | 9  |
| <b>Fig. S6</b> Quantitation of fluorescently labeled substrate on one AuNP..... | 10 |
| <b>Table S2.</b> Selected methods for DPPIV detection.....                      | 11 |
| <b>Fig S7.</b> Analysis of the reproducibility of the biosensor.....            | 12 |
| <b>Fig S8.</b> Recovery analysis of the biosensor .....                         | 13 |
| <b>References.</b> .....                                                        | 14 |
| <b>Author contributions</b> .....                                               | 15 |

**Table S1.** The DNA sequences used in this work.

| Name             | Sequences (5' -3')                                                    |
|------------------|-----------------------------------------------------------------------|
| pep-CHA-H0       | Maleimide-TTT TTT TTT TTT TTT TGG AAA CAC CAC CCA TAT CGC T           |
| CHA-H0           | TTT TTT TTT TTT TTT TGG AAA CAC CAC CCA TAT CGC T                     |
| CHA-H1           | GTC ATT CAG CGA TAT GGG TGG TGT TTC CAC CCA TGT ACG AAA CAC CAC CCA T |
| CHA-H2           | GTG TTT CGT ACA TGG GTG GAA ACA CCA CCC ATC ACC CAT GTA CAG TCA       |
| DNAzymes         | GTC ATT CAG CGA TCA CCC ATG TAC AGT CA                                |
| HS-Substrate-FAM | HS-TTT TTT TTT TTT TTG ACT GTT /rA/GG AAT GAC-FAM                     |

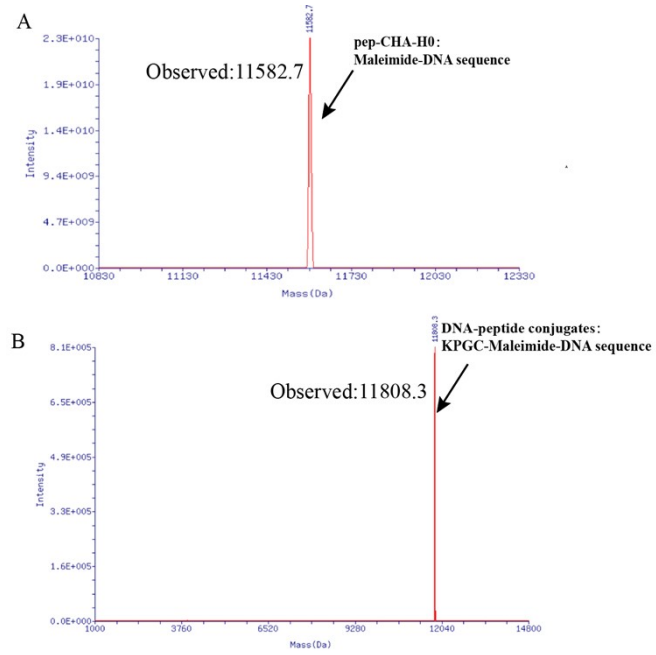

**Fig.S1** Mass spectrum of the pep-CHA-H0 and DNA-peptide conjugates

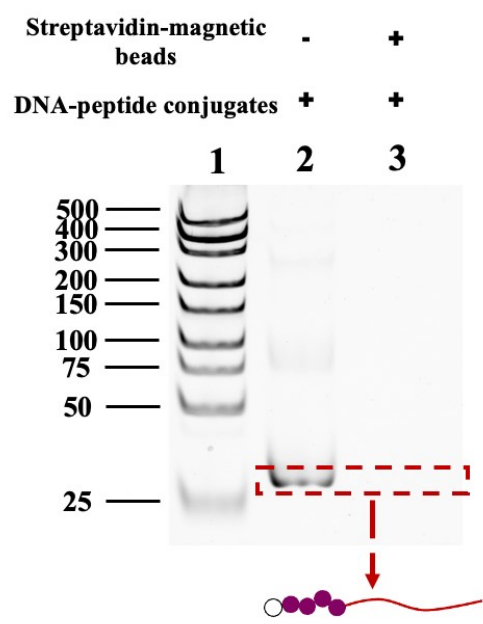

**Fig.S2** Supernatants before and after magnetic conjugation.

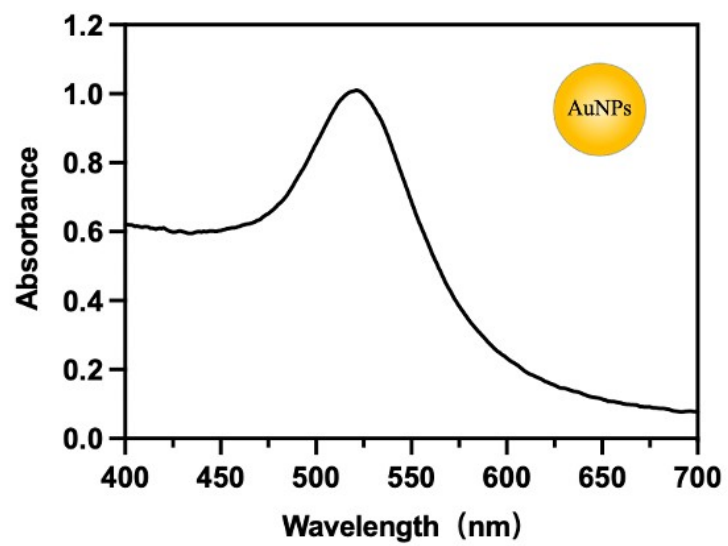

**Fig.S3** UV-vis absorbance responses of bare AuNPs.

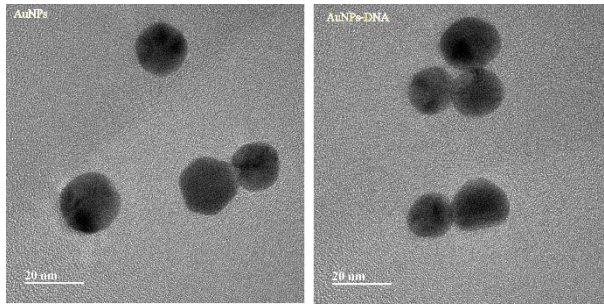

**Fig. S4** TEM of AuNPs and AuNPs-DNA

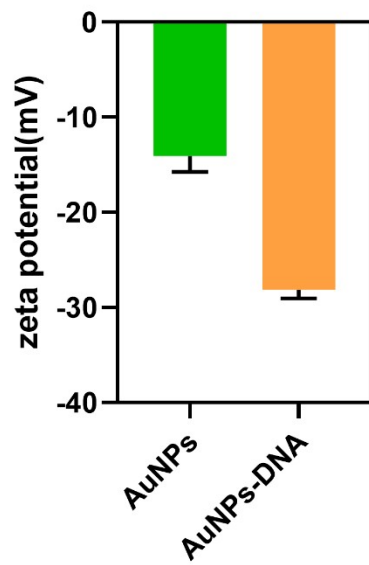

Fig. S5 zeta potential of AuNPs and DNA-AuNPs



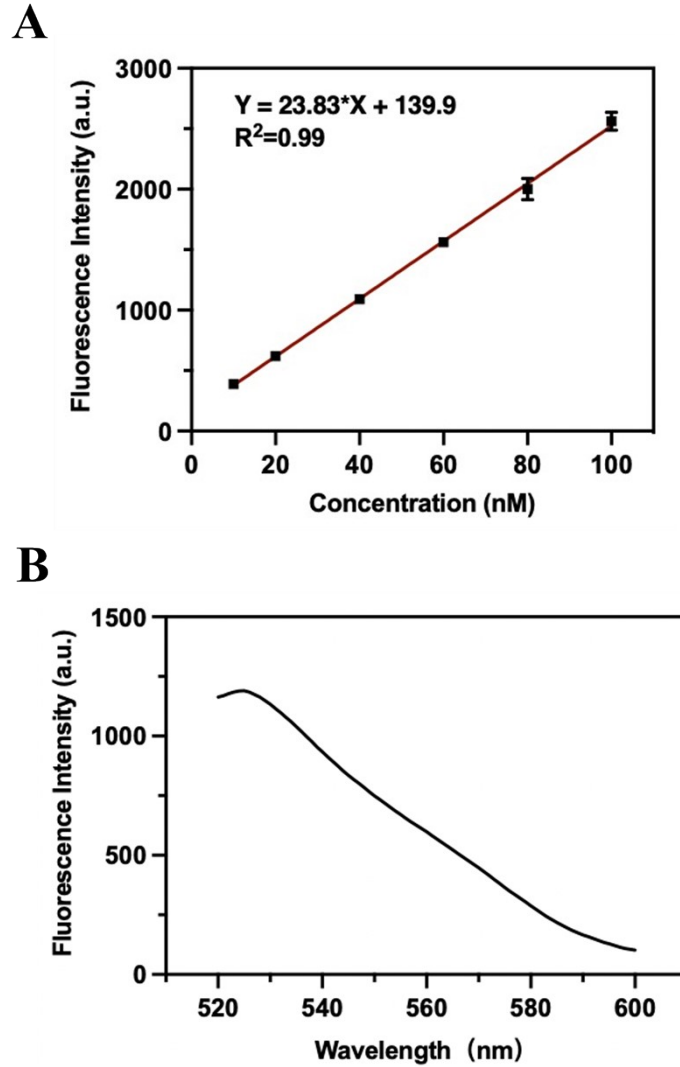

**Fig. S6** Quantitation of fluorescently labeled substrate on one AuNP. (A) The corresponding curve between the FAM-labeled substrates concentrations and the signal intensity at 520 nm. (B) Fluorescence spectra of HS-substrate-FAM released from the surface of the signal output signal probe. The data error bars indicate mean  $\pm$  SD (n= 3).

**Table S2.** Selected methods for DPPiV detection

| Technique                                 | Linear range                    | LOD                      | Reference |
|-------------------------------------------|---------------------------------|--------------------------|-----------|
| Bioluminescence sensing                   | 2.0 – 40.0 mU•mL <sup>-1</sup>  | 0.78 mU•mL <sup>-1</sup> | 32        |
| Liquid                                    |                                 |                          |           |
| Chromatography–<br>fluorescence Detection | 1.0 - 100.0 ng/mL               | 25 pg/L                  | 33        |
| Fluorescence<br>Spectrophotometry         | 10.0 -180.0 ng/mL               | 18.62 ng/mL              | 34        |
| Colorimetry                               | 10.0 - 30.0 mU•mL <sup>-1</sup> | >10 mU•mL <sup>-1</sup>  | 35        |
| Colorimetry                               | 0 - 12.0 mU•mL <sup>-1</sup>    | 1.2 mU•mL <sup>-1</sup>  | 36        |
|                                           | 0 - 30.0 mU•mL <sup>-1</sup>    | 1.5 mU•mL <sup>-1</sup>  |           |
| Fluorescence<br>Spectrophotometry         | 1.0 –5.0 mU•mL <sup>-1</sup>    | 0.18 mU•mL <sup>-1</sup> | This work |

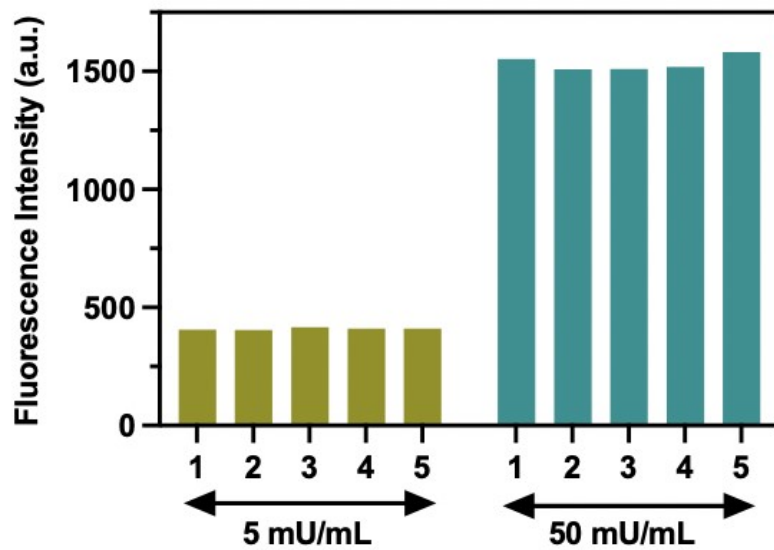

**Fig. S7.** Analysis of the reproducibility of the fabricated biosensor by detecting  $5 \text{ mU} \cdot \text{mL}^{-1}$  and  $50 \text{ mU} \cdot \text{mL}^{-1}$  DPPIV with 5 independent samples.

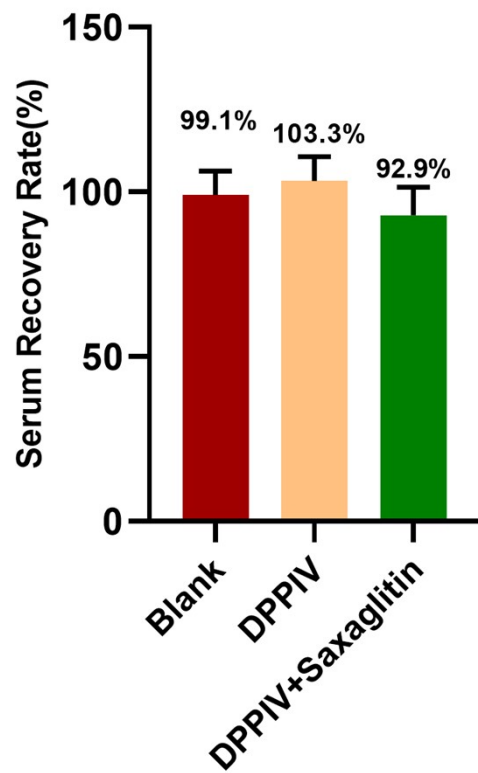

**Fig. S8** The recovery rates of Blank, DDPPIV and DPPIV+Saxaglitin groups in 10%serum samples were analyzed

## References.

- 35 Ren, Y., Y. Qiang, B. Zhu, W. Tang, X. Duan, and Z. Li, *Analytical Chemistry*. 2021, **93**, 4334-4341.
- 36 Ma, H., X.-K. Qian, J. Zhang, Q. Jin, L.-W. Zou, S.-Q. Liu, and G.-B. Ge, *Analytical Methods*. 2020, **12**, 848-854.
- 37 Zhao, Y., J. Zou, Y. Song, J. Peng, Y. Wang, and Y. Bi, *Chemical Communications*. 2020, **56**, 1629-1632.
- 38 Aldewachi, H., N. Woodroffe, and P. Gardiner, *Applied Sciences*. 2018, **8**,
- 39 Aldewachi, H.S., N. Woodroffe, S. Turega, and P.H.E. Gardiner, *Talanta*. 2017, **169**, 13-19.

### **CRedit authorship contribution statement**

Yan Chen, Miao He: Conceptualization, Methodology, Software, Investigation, Validation, Data curation, Writing-original draft. Feifan Yin: Investigation. Wenting Cheng: Validation, Investigation. Zhongyun Wang: Resources, Supervision. Yang Xiang: Conceptualization, Methodology, Review & editing, Supervision, Funding acquisition. All authors have given approval to the final version of the manuscript.
